# Supplementary material
Source: PubMed Central journal article supplement (PMC3984332)
Supplement: mabs-6-437-s01.pdf [file mabs-6-437-s01.pdf]

## **Supplemental Material to:**

**Bing Li, Ashley Fouts, Katharina Stengel, Peng Luan, Michael Dillon, Wei-Ching Liang, Becket Feierbach, Robert F Kelley, and Isidro Hötzel**

**In vitro affinity maturation of a natural human antibody overcomes a barrier to in vivo affinity maturation**

**2013; mAbs 6(2)**

**<http://dx.doi.org/10.4161/mabs.27875>**

**<https://www.landesbioscience.com/journals/mabs/article/27875/>**

*In vitro* affinity maturation of a natural human antibody overcomes a barrier  
to *in vivo* affinity maturation

Bing Li, Ashley Fouts, Katharina Stengel, Peng Luan, Michael Dillon, Wei-Ching Liang, Becket  
Feierbach, Robert F. Kelley and Isidro Hötzel

Supplementary Figures

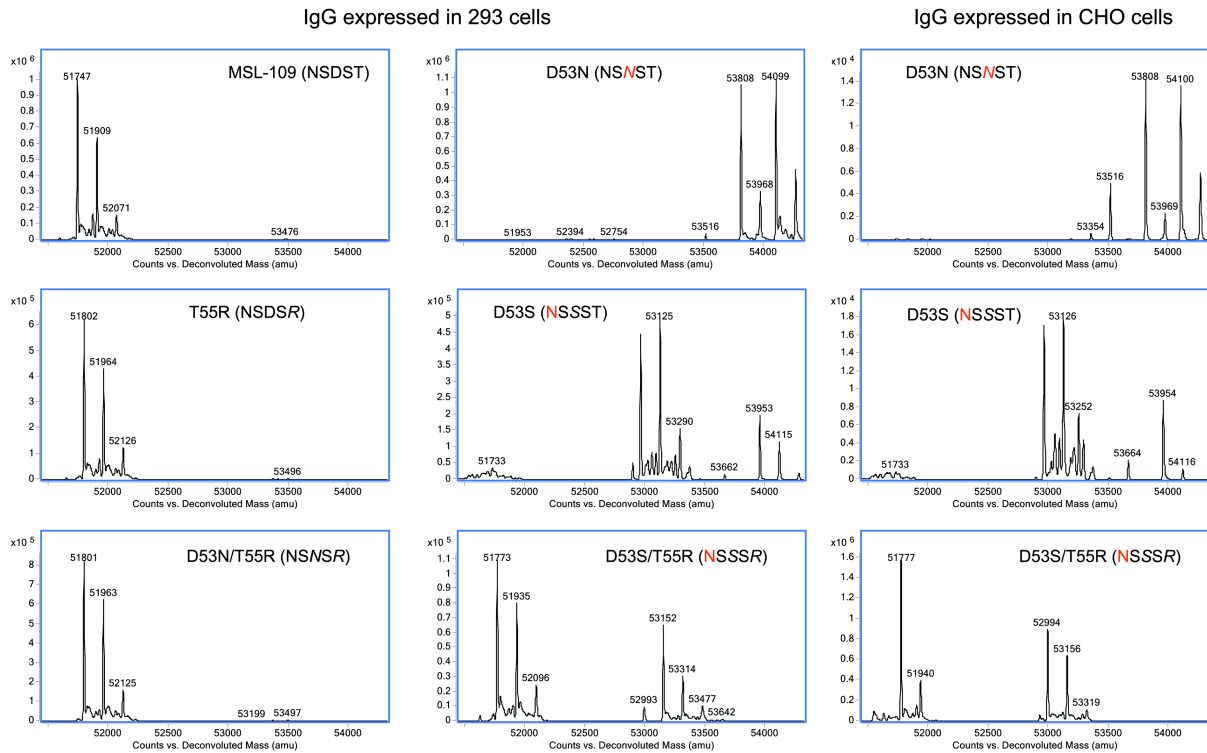

Supplementary Figure 1 – Mass spectrometry analysis of IgG heavy chains from different MSL-109 variants expressed in 293 and CHO cells. The sequence between heavy chain residues 52 and 55 of each variant is shown in parenthesis with mutation shown in *italics* and potential glycosylation sites in red. The light chains of all IgG variants had a mass of  $23,981 \pm 1$  Da (calculated reduced mass = 23,980), omitted for clarity.

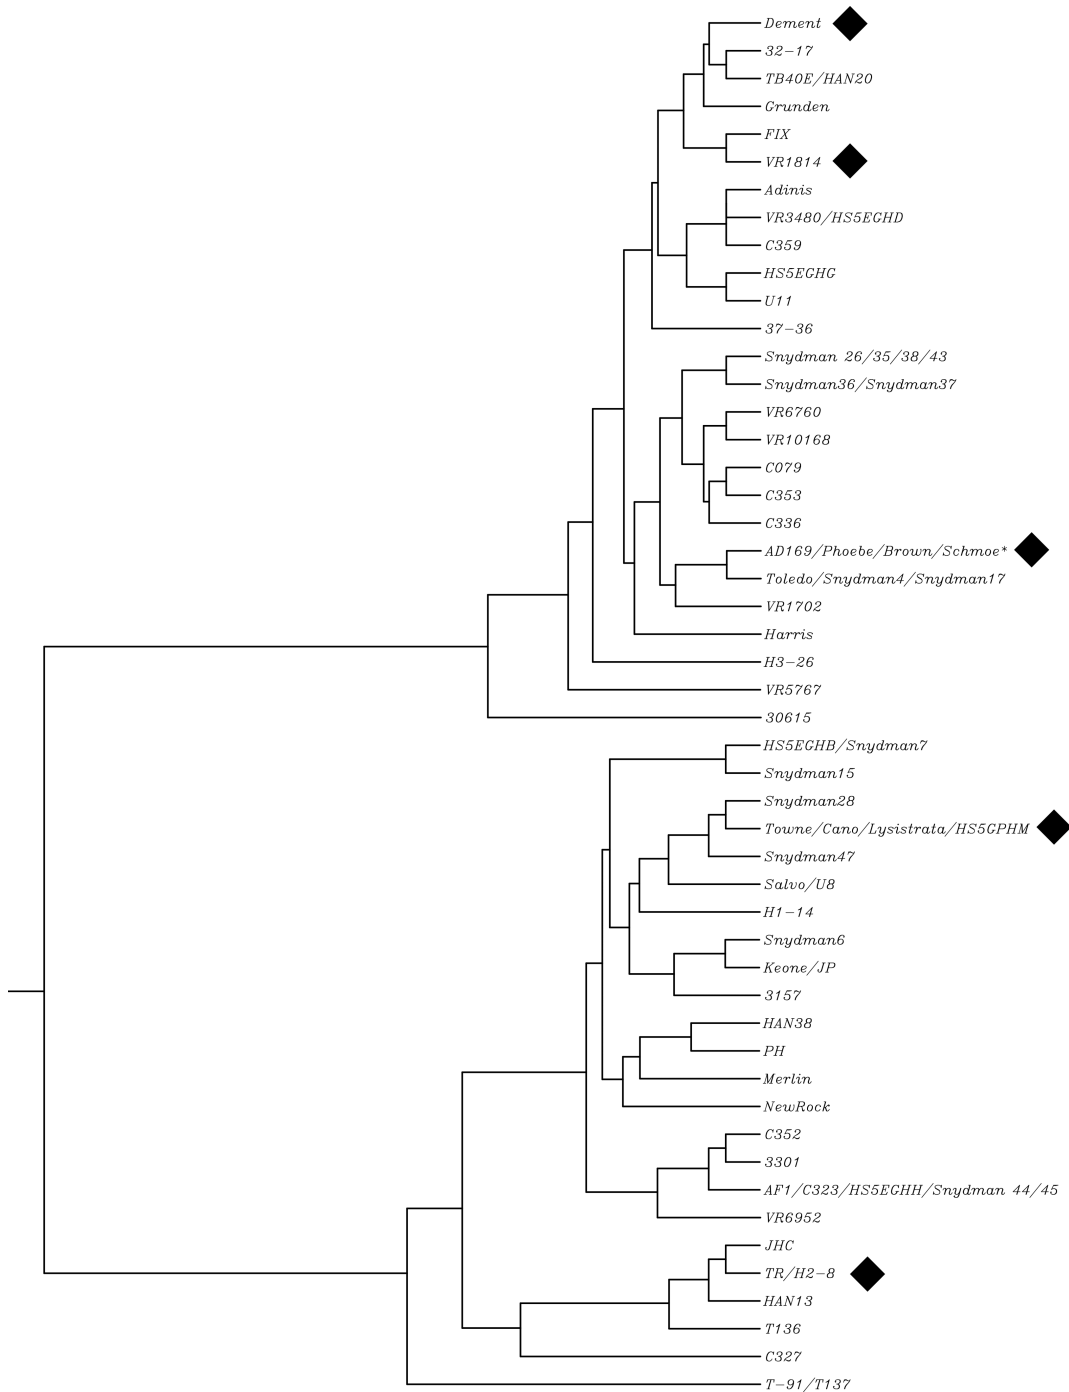

Supplementary Figure 2 – Dendrogram of CMV strains based on gH glycoprotein sequences. The six strains used in neutralization assays are indicated with diamonds. The asterisk indicates three additional strains, Watkins, Powers and HS5GLYH, that have gH sequences identical to AD169, Phoebe, Brown and Schmoe. The overall minimum amino acid identity, between strains 37-36 and VR6952, is 96.1%. The strain used in neutralization assays with gH most distantly related to VR1814 is Cano, with 96.8% identity.

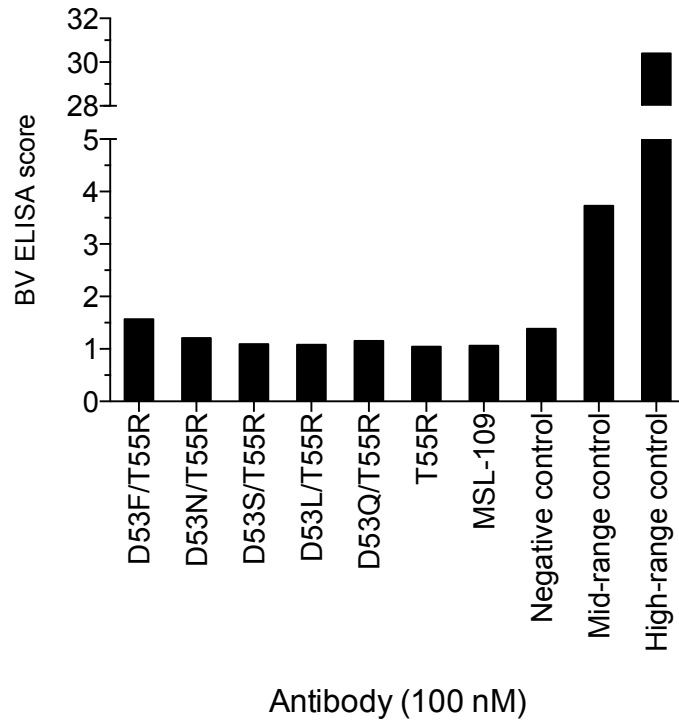

Supplementary Figure 3 – Non-specific baculovirus (BV) particle ELISA of MSL-109 mutant clones with baculovirus particle antigen. The BV ELISA score is the absorbance with the test IgG divided by the absorbance of blank wells (no IgG).
